# Supplementary material for: Intelligent nanoscope for rapid nanomaterial identification and classification
Source: Royal Society of Chemistry journal article supplement (doi:10.1039/d2lc00206j), 2022-01-01
Supplement: d2lc00206j1.pdf [file d2lc00206j1.pdf]

## Supporting Information

### **Intelligent nanoscope for rapid nanoparticle identification and classification**

*Geonsoo Jin,<sup>a</sup> Seongwoo Hong,<sup>b</sup> Joseph Rich,<sup>c</sup> Jianping Xia,<sup>a</sup> Kyeri Kim,<sup>c</sup> Lingchong You,<sup>cde</sup>*

*Chenglong Zhao,<sup>\*fg</sup> and Tony Jun Huang<sup>\*a</sup>*

<sup>a</sup> *Thomas Lord Department of Mechanical Engineering and Materials Science, Duke University, Durham, NC 27708, USA.; E-mail: tony.huang@duke.edu*

<sup>b</sup> *Office of Biomedical Graduate Education, Duke University School of Medicine, Durham, NC 27710, USA.*

<sup>c</sup> *Department of Biomedical Engineering, Duke University, Durham, NC 27708, USA.; E-mail: you@duke.edu*

<sup>d</sup> *Center for Genomic and Computational Biology, Duke University, Durham, NC 27708, USA*

<sup>e</sup> *Department of Molecular Genetics and Microbiology, Duke University School of Medicine, Durham, NC 27708, USA*

<sup>f</sup> *Department of Physics, University of Dayton, 300 College Park, Dayton, Ohio 45469, USA.; E-mail: czhao1@udayton.edu*

<sup>g</sup> *Department of Electro-Optics and Photonics, University of Dayton, 300 College Park, Dayton, Ohio 45469, USA.*

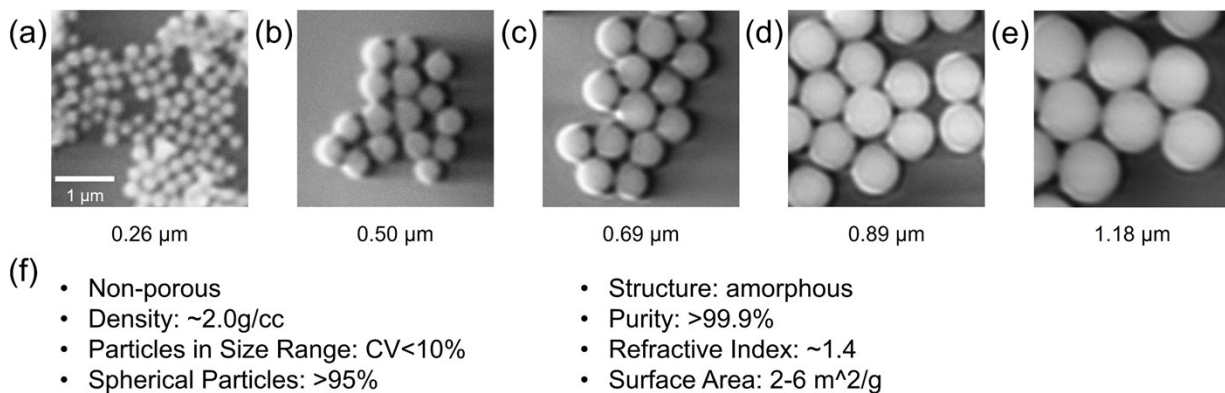

**Fig. S1.** Magnified images of  $\text{SiO}_2$  nanoparticles are taken by SEM. (a)  $0.26\ \mu\text{m}$ , (b)  $0.50\ \mu\text{m}$ , (c)  $0.69\ \mu\text{m}$ , (d)  $0.89\ \mu\text{m}$ , (e)  $1.18\ \mu\text{m}$ . (f) Specification data of nanoparticles provided by the manufacturer ([https://www.cospheric.com/SiO2MS\\_monodisperse\\_silica\\_spheres\\_beads\\_nm\\_microns.htm](https://www.cospheric.com/SiO2MS_monodisperse_silica_spheres_beads_nm_microns.htm)).

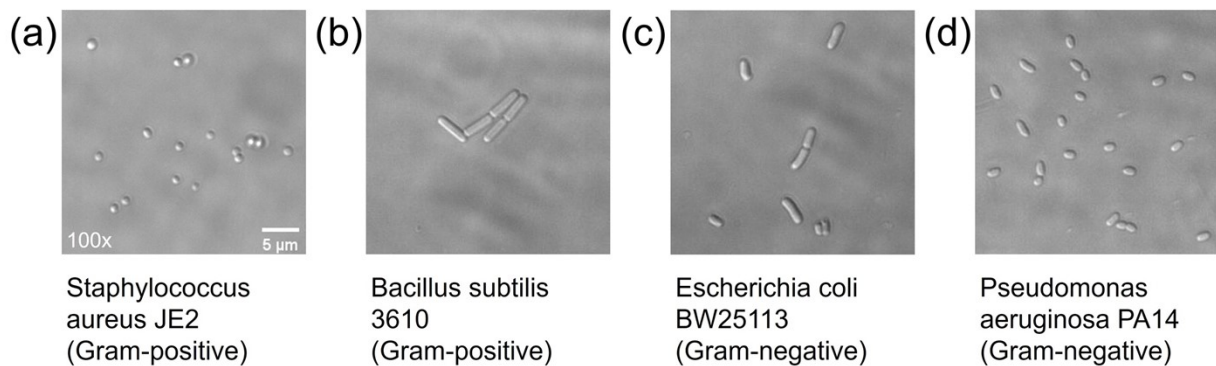

| (nm)               | Round shape |             | Rod shape |        |         |        |
|--------------------|-------------|-------------|-----------|--------|---------|--------|
|                    | S. aureus   | Pseudomonas | Bacillus  |        | E. coli |        |
|                    | radius      | radius      | width     | length | width   | length |
| Average (N=5)      | 1,088       | 1,337       | 1178      | 4264   | 1346    | 3356   |
| Standard deviation | 62          | 68          | 71        | 367    | 79      | 496    |
| Difference         | 249         |             | 168       | 908    |         |        |

| (f)                              | Microscopic image based classification <sup>1</sup> | Electronic identification method <sup>2</sup> | Fluorescence staining method <sup>3</sup> | Intelligent nanoscope       |
|----------------------------------|-----------------------------------------------------|-----------------------------------------------|-------------------------------------------|-----------------------------|
| System setup complexity          | Simple                                              | Complex                                       | Complex                                   | Simple                      |
| Number of categories of bacteria | 2                                                   | 5                                             | 5                                         | 4                           |
| Training data collection time    | Long (> hours)                                      | Short ( $\cong$ 75 seconds)                   | Long ( $\cong$ 8.9 hours)                 | Short ( $\cong$ 10 seconds) |

**Fig. S2.** Magnified microscopic images of four different kinds of bacteria samples are taken with a 100x objective (NA:0.9, Nikon Ti-E, Japan): (a) *Staphylococcus aureus* JE2, (b) *Bacillus subtilis* 3610, (c) *Escherichia coli* BW25113, and (d) *Pseudomonas aeruginosa*. (e) Average size comparison in similar shape of bacteria cells. Round shape comparison for *Staphylococcus aureus* JE2 and *Pseudomonas aeruginosa*. Rod shape comparison for *Bacillus subtilis* 3610 and *Escherichia coli* BW25113. (f) Comparison table for other bacteria classification technologies based on machine learning.<sup>1-3</sup>

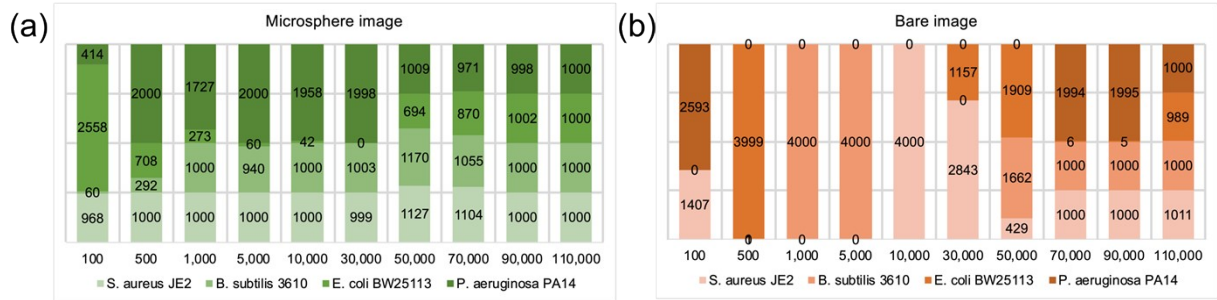

**Fig. S3.** Classification test results for each (a) microsphere image and (b) bare image of the four different kinds of bacteria for a given number of training images. 1,000 separately selected images from each category are inputted for the prediction test.

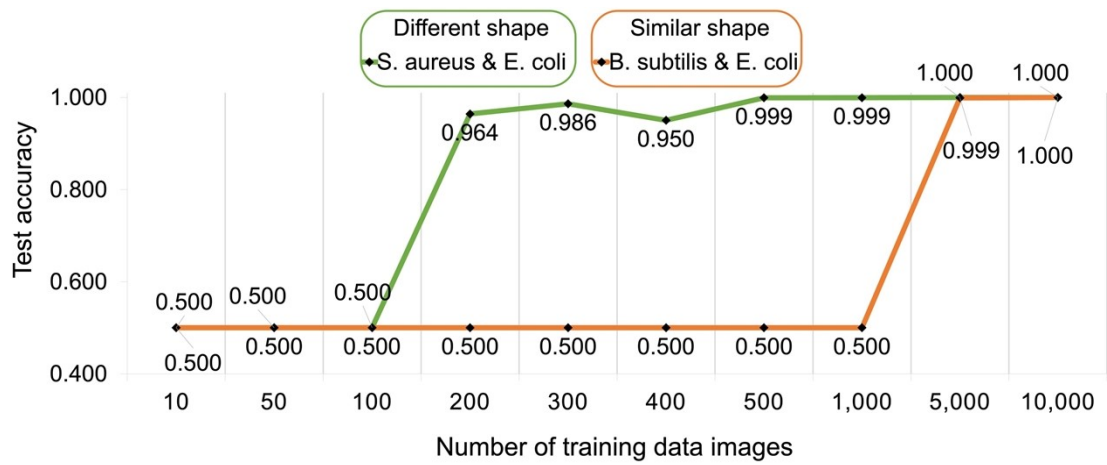

**Fig. S4.** Bacteria classification accuracy for the different shaped bacteria subsets with varying amounts of training data. The green graph represents the classification accuracy between the two different shaped bacteria samples (S.aureus (spherical) and E. coli (rod-like)) using the microsphere imaging method, and the orange graph represents the classification accuracy between the two similarly shaped bacteria samples (B. subtilis (rod-like) and E. coli (rod-like)) using the microsphere imaging method. 100 to 10,000 data images were used for the model training.

| Objective<br>(magnification/NA) | Field of view ( $\mu\text{m}$ ) | Lateral resolution<br>( $\mu\text{m}$ ) |
|---------------------------------|---------------------------------|-----------------------------------------|
| 10x/0.25                        | 1,800                           | 1.34                                    |
| 20x/0.40                        | 900                             | 0.84                                    |
| 40x/0.55                        | 450                             | 0.61                                    |
| 100x/0.95                       | 180                             | 0.35                                    |

**Table. S1.** Comparison of the field of view and resolutions of different objective lenses.<sup>4</sup>

**References:**

1. T. Treebupachatsakul and S. Poomrittigul, 2019 34th international technical conference on circuits/systems, computers and communications (ITC-CSCC), 2019, 1-3.
2. S. Hattori, R. Sekido, I. W. Leong, M. Tsutsui, A. Arima, M. Tanaka, K. Yokota, T. Washio, T. Kawai and M. Okochi, *Scientific reports*, 2020, **10**, 1-10.
3. Y. Seo, B. Park, A. Hinton, S.-C. Yoon and K. C. Lawrence, *Journal of Food Measurement and Characterization*, 2016, **10**, 253-263.
4. J. W. Ager III, *AIP Conference Proceedings*, 1998, **1**, 641-652.
